# Supplementary material
Source: Elsevier journal article supplement (https://www.sciencedirect.com/science/article/pii/S0121812321000402)
Supplement: mmc1 [file S0121812321000402:mmc1.pdf]

## **Lupus Eritematoso Sistémico y Embarazo: estrategias antes, durante y después del embarazo para mejorar los desenlaces.**

### **Autores**

María del Carmen Zamora-Medina MD<sup>1</sup>, Oralia Alejandra Orozco-Guillén MD<sup>1</sup>,  
Maricruz Domínguez-Quintana MD<sup>2</sup>, Juanita Romero-Díaz MD, MS<sup>2</sup>

<sup>1</sup>Departamento de Cuidados Intensivos, Instituto Nacional de Perinatología Isidro  
Espinosa de los Reyes, Ciudad de México, México.

<sup>2</sup>Departamento de Inmunología y Reumatología, Instituto Nacional de Ciencias  
Médicas y Nutrición Salvador Zubirán, Ciudad de México, México.

### **Correspondencia:**

María del Carmen Zamora Medina MD

Correo electrónico: [mczam4@gmail.com](mailto:mczam4@gmail.com)

### **Resumen**

El lupus eritematoso sistémico es un trastorno autoinmune multisistémico que afecta primordialmente a mujeres en edad reproductiva. El embarazo en mujeres con LES aún se considera una condición de alto riesgo, a pesar de que diversas estrategias pueden mejorar los desenlaces maternos y fetales. La asesoría pre-concepción es fundamental y debe incluir la identificación de factores de riesgo de desenlaces adversos del embarazo, una explicación de las posibles complicaciones maternas y obstétricas, así como la planificación oportuna del embarazo. La estratificación de riesgos debe considerar el daño orgánico terminal, las comorbilidades, la actividad de la enfermedad y el perfil de autoanticuerpos, a fin de llevar a cabo un plan de monitoreo de los riesgos individuales del embarazo por parte de un equipo multidisciplinario. La hidroxycloquina y la aspirina a bajas dosis, han demostrado reducir el riesgo de exacerbaciones de la enfermedad y de preeclampsia con un buen perfil de seguridad, por lo cual se recomienda su uso en todas las pacientes con LES durante el embarazo. La nefritis lúpica y la preeclampsia comparten características clínicas y de laboratorio, obstaculizando la diferenciación entre las dos entidades. Nuevos marcadores angiogénicos y hallazgos ecográficos fetales pudieran ser de utilidad para el diagnóstico diferencial, especialmente después de las 20 semanas de gestación. Los anticuerpos antifosfolípidos, en particular el anticoagulante lúpico, tiene una estrecha asociación con las complicaciones obstétricas. El tratamiento con aspirina a bajas dosis y heparina, según el perfil de riesgos, puede mejorar las tasas de nacimientos vivos. Los anticuerpos anti-Ro/La representan un riesgo de lupus neonatal, por lo cual debe instituirse tratamiento preventivo y vigilancia fetal especial.

**Palabras claves:** Lupus eritematoso, Sistémico, Embarazo, Lupus eritematoso sistémico neonatal, Nefritis lúpica, Anticuerpos, Antifosfolípidos.

## **Systemic Lupus Erythematosus and Pregnancy: strategies before, during and after pregnancy to improve outcomes**

### **Abstract**

Systemic lupus erythematosus is a multisystemic autoimmune disorder that predominantly affects women in reproductive years. Pregnancy in women with SLE is still considered a high-risk condition although several strategies may improve maternal and fetal outcomes. Preconception counseling is fundamental and should include identification of risk factors for adverse pregnancy outcomes, explanation of potential maternal and obstetric complications and timely planning of pregnancy. Risk stratification must consider end-organ damage, comorbidities, disease activity and autoantibodies profile in order to implement an individual-risk pregnancy monitoring plan by a multidisciplinary team. Hydroxychloroquine and low dose aspirin have shown to lower the risk of disease flares and preeclampsia with a good safety profile, so its use during pregnancy in all SLE patients is recommended. Lupus nephritis and preeclampsia share clinical and laboratory features hindering differentiation between both entities. Novel angiogenic markers and fetal ultrasound findings could be helpful in the differential diagnosis, especially after 20 weeks of gestation. Antiphospholipid antibodies, particularly lupus anticoagulant, are closely associated with obstetric complications. Therapy with low dose aspirin and heparin, according to risk profile, may improve live birth rates. Anti-Ro/La antibodies confer risk for neonatal lupus, and therefore preventive therapy and special fetal surveillance should be instituted.

**Keywords:** Lupus Erythematosus, Systemic, Pregnancy, Neonatal Systemic Lupus Erythematosus, Lupus Nephritis, Antibodies, Antiphospholipid.

### **INTRODUCCIÓN**

El lupus eritematoso sistémico (LES) es una enfermedad autoinmune multisistémica, con una evolución de remisiones y recaídas. Afecta principalmente a mujeres jóvenes en edad reproductiva, por lo cual abordar temas como el embarazo, es una parte esencial del manejo integral de estas pacientes.

El embarazo es un período crítico en la vida de la mujer, debido a los profundos cambios inmunológicos y hormonales que tienen que producirse para tolerar el feto. La interacción entre el LES y las adaptaciones inmunológicas del embarazo, da lugar a desafíos únicos en este escenario, pues las alteraciones de los mecanismos inmunológicos pueden tener consecuencias tanto sobre el feto como sobre la madre.

Anteriormente se desalentaba el embarazo en mujeres con LES debido a la preocupación por exacerbaciones de la enfermedad o desenlaces adversos del embarazo (DAEs). En la actualidad, una mejor comprensión de la relación entre la enfermedad y el embarazo, ha dado lugar a un monitoreo y manejo individualizado, basado en los riesgos, para lograr desenlaces exitosos del embarazo en pacientes con LES.

Esta revisión abordará la relación entre la actividad del lupus y el embarazo, así como el impacto del LES sobre los desenlaces del embarazo. Se analizarán las estrategias antes, durante y después del embarazo, para mejorar los resultados. Los escenarios de alto riesgo durante el embarazo en pacientes con LES, incluyendo la presencia de nefritis lúpica (NL), la presencia de anticuerpos anti-Ro/SSA y/o anti-La/SSB y los antifosfolípidos (aPL) positivos o el síndrome antifosfolípidos asociado a LES (SAP), ameritan un monitoreo y manejo específicos y por ende se analizaran de manera individual.

## **METODOLOGÍA**

Se llevó a cabo una revisión de la literatura no sistemática, buscando en las bases de datos MEDLINE y Embase, utilizando los términos MeSH: "Lupus Erythematosus, Systemic" AND "Pregnancy outcomes" AND "Flares" AND "Medications" OR "Systemic lupus erythematosus pregnancy") OR "Lupus nephritis in pregnancy" OR "Neonatal Systemic Lupus Erythematosus". La búsqueda se limitó a trabajos publicados en español o en inglés, desde 1990 hasta 2020.

## **RESULTADOS**

### **Influencia del LES sobre los desenlaces del embarazo**

A pesar de los avances diagnósticos y terapéuticos, el embarazo en pacientes con LES se sigue considerando una condición de alto riesgo debido al elevado riesgo de complicaciones obstétricas y neonatales mayores. Un estudio poblacional de 2000-2003 encontró que la mortalidad materna era 20 veces mayor entre mujeres con LES. El riesgo de complicaciones médicas graves y relacionadas con el embarazo, también fue de 3 a 7 veces mayor en mujeres con LES, en comparación con la población general.<sup>1</sup>

En los últimos años, los desenlaces durante el embarazo en pacientes con LES han mejorado como resultado de la asesoría pre-concepción, un monitoreo estricto durante el embarazo, y un manejo postparto y multidisciplinario.<sup>2</sup> Sin embargo, de acuerdo con un metaanálisis reciente, la morbilidad materno fetal sigue siendo más alta en los embarazos de mujeres con LES.<sup>3</sup> Adicionalmente, se ha estimado que las mujeres con LES tienen menos nacimientos vivos en comparación con la población general.<sup>4</sup>

### **Impacto del embarazo sobre la enfermedad: actividad y exacerbaciones del LES**

Las adaptaciones inmunológicas durante el embarazo y el postparto pueden influir de diversas formas sobre la enfermedad autoinmune de la madre. Puesto que el LES se considera principalmente una enfermedad mediada por Th2, los cambios inmunes relacionados con el embarazo pudieran teóricamente desencadenar el inicio de la enfermedad o aumentar el riesgo de exacerbaciones durante este período.<sup>5</sup>

El riesgo de exacerbaciones del LES durante el embarazo ha sido un tema controversial. La mayoría de los estudios prospectivos en embarazos de pacientes con LES, ha demostrado que el riesgo de exacerbación de la enfermedad es mayor durante el embarazo, a pesar de que existen algunas discrepancias en virtud de la heterogeneidad de las definiciones de exacerbación en lupus, y de las herramientas utilizadas para evaluar la actividad lúpica.<sup>6</sup> Los nuevos estudios que utilizan instrumentos validados para la valoración de la actividad de la enfermedad del lupus, han encontrado un incremento de 2 a 3 veces en la actividad del LES durante el embarazo.<sup>7,8</sup> La mayoría de estas exacerbaciones se consideran leves a moderadas y pueden afectar el sistema renal, hematológico y músculo-

esquelético. Igualmente, el compromiso orgánico previo pareciera predecir el mismo tipo de afectación durante el embarazo.

La actividad de la enfermedad al momento de la concepción y durante los 6 meses previos a ésta, tanto desde el punto de vista clínico como serológico, es un predictor clave, no solo de complicaciones obstétricas, sino de exacerbaciones del LES durante el embarazo. Los estudios prospectivos en pacientes embarazadas con lupus, han reportado algunos factores de riesgo de la actividad del LES durante el embarazo: un mayor número de exacerbaciones antes del embarazo, un alto índice SLEDAI antes del embarazo y actividad del LES pre-concepción.<sup>9,10</sup> De hecho, existe un riesgo de aproximadamente siete veces mayor de exacerbación severa del lupus en pacientes con LES activo al momento de la concepción.<sup>11</sup> Más aun, la actividad de la enfermedad LES inmediatamente antes del embarazo, también tiene un impacto sobre la acumulación de daño después del embarazo.<sup>12</sup>

Por otra parte, la actividad del LES durante o antes del embarazo, se asocia con diversas complicaciones maternas y fetales, tales como la pérdida del feto, nacimiento pretérmino, retardo del crecimiento intrauterino (RCIU) y complicaciones por hipertensión. Por lo tanto, es esencial hacer una identificación temprana y ofrecer tratamiento oportuno a la mujer embarazada con actividad lúpica, para mejorar los desenlaces del embarazo.<sup>13</sup>

## **Estrategias para mejorar los desenlaces en el embarazo**

### **1. Antes del embarazo: Asesoría pre-concepción**

La asesoría pre-concepción es esencial para identificar los factores de riesgo de DAEs en mujeres con LES. Esta valoración es importante para una implementación oportuna de estrategias preventivas y para establecer un plan de monitoreo multidisciplinario, individualizado para cada paciente, antes y durante el embarazo.<sup>14</sup>

Las actuales recomendaciones destacan la importancia de la asesoría pre-concepción en mujeres con lupus, a pesar de que se han identificado algunas barreras a la asesoría en planificación familiar.<sup>14,15</sup> La ansiedad por el manejo de embarazos de alto riesgo en mujeres con LES y la falta de recomendaciones por consenso en lo que respecta a la seguridad de los medicamentos durante el embarazo, fueron dificultadas expresadas por los reumatólogos con relación a la asesoría en planificación familiar, según un estudio basado en entrevistas semi-estructuradas.<sup>16</sup> Se deben promover conversaciones abiertas y precisas sobre planificación del embarazo entre el reumatólogo y la paciente con LES en edad fértil. Una estrategia consiste en formular una única pregunta simple para abordar el tema directamente: ¿Usted desear quedar embarazada en el próximo año? Este método basado en una sola pregunta, puede ayudarle al reumatólogo o a los médicos a cuidar de las pacientes con LES, para atender efectivamente durante la consulta el deseo de ser madres.<sup>17</sup>

Dado el muy alto riesgo de complicaciones maternas, en algunos escenarios se debe desalentar el embarazo, como sería en caso de una actividad moderada a severa del LES, accidente cerebrovascular en los pasados 6 meses, hipertensión pulmonar severa, insuficiencia cardíaca moderada a severa (FEVI <40%), enfermedad renal crónica terminal, historia de preeclampsia temprana (<28 semanas) y síndrome HELLP a pesar de haber recibido tratamiento.<sup>2</sup>

La estratificación de riesgos se debe individualizar de acuerdo con diversos factores, entre ellos la presencia de comorbilidades, la actividad de la enfermedad, daño orgánico relacionado con la enfermedad y perfil de autoanticuerpos (aPL, anti-Ro/SSA y anti-La/SSB). En mujeres que han tenido embarazos previos, la historia de desenlaces adversos en dichos embarazos es muy pertinente para establecer la probabilidad de complicaciones en embarazos futuros.

Como se mencionó anteriormente, la actividad de la enfermedad al momento de la concepción y durante los 6 meses anteriores, es un predictor clave de complicaciones obstétricas y exacerbaciones de LES; por lo tanto, las mujeres con LES deben concebir durante un período de enfermedad estable o inactiva de por lo menos 6 meses, para la seguridad de la madre y un óptimo desenlace del embarazo. Si la enfermedad está activa, debe posponerse el embarazo e iniciarse tratamiento agresivo. Los embarazos planificados durante una actividad de la enfermedad estable o baja, se asocian con mejores resultados, incluyendo tasas de nacimientos vivos más elevadas, en comparación con los embarazos no planificados en mujeres con LES.<sup>18,19</sup>

Evaluar la condición de los autoanticuerpos ayuda a determinar ciertos riesgos específicos del embarazo y a diseñar un plan de monitoreo para la madre y el feto, así como a definir la necesidad de tratamiento adicional. Toda mujer con LES debe evaluarse para identificar la presencia de anticuerpos aPL, anti-Ro/SSA y anti-La/SSB antes de, o muy temprano en el embarazo, a fin de establecer el riesgo de aborto espontáneo y de lupus neonatal, respectivamente.<sup>15,20</sup>

Además de los factores relacionados con la enfermedad, las mujeres con LES tienen mayor probabilidad de presentar otras condiciones médicas como diabetes mellitus, hipertensión y trombofilia, que aumentan significativamente el riesgo de DAE.<sup>1</sup> La hipertensión arterial genera un mayor riesgo de pérdida del embarazo (OR 2,4, RR 2,9), de nacimientos pretérmino y de RCIU (OR 6,8), por lo cual un control óptimo de la presión arterial con el uso de anti-hipertensivos compatibles con el embarazo durante todo el periodo de gravidez resulta esencial.<sup>33,34</sup>

El período pre-concepción es el momento más indicado para evaluar los medicamentos que se estén utilizando para el LES y, en caso de estar tomando medicamentos contraindicados en el embarazo, cambiar a medicamentos que sean compatibles para el control de la enfermedad, a fin de minimizar los riesgos, tanto para la madre como para el feto. Adicionalmente, la planificación del embarazo permite verificar la estabilidad de la enfermedad luego de hacer las modificaciones al tratamiento y garantiza el lavado adecuado de los fármacos teratogénicos. A pesar de que la información basada en evidencia respecto a la seguridad de los fármacos antirreumáticos modificadores de la enfermedad en el embarazo es escasa, las organizaciones de reumatología han llevado a cabo sus propios análisis sobre el uso de medicamentos durante el embarazo y la lactancia, para facilitar las decisiones terapéuticas; dicha información se resume en la Tabla 1.<sup>14,15,21</sup>

**Tabla 1.** Medicamentos compatibles con el embarazo y la lactancia. Adaptado de 14,15,21

| MEDICAMENTO                                                | EMBARAZO                                                                                                                                      | LACTANCIA                                                                        |
|------------------------------------------------------------|-----------------------------------------------------------------------------------------------------------------------------------------------|----------------------------------------------------------------------------------|
| <b>Corticoesteroides</b>                                   | Compatible. Dosis óptima menos de 20 mg/día; posible mayor riesgo de parto pretérmino y bajo peso al nacer con dosis mayores.                 | Compatible. Idealmente esperar 2 horas después de tomar la dosis para amamantar. |
| <b>Metotrexato</b>                                         | Contraindicado; teratogénico<br>Suspender 6 meses antes.                                                                                      | No se recomienda                                                                 |
| <b>Leflunomida</b>                                         | Contraindicado. En caso de embarazo no planificado durante tratamiento, administrar colestiramina.                                            | No se recomienda                                                                 |
| <b>Sulfasalazina</b>                                       | Compatible. Se requiere suplementar con folato                                                                                                | Compatible                                                                       |
| <b>Hidroxicloroquina</b>                                   | Compatible. Reduce el riesgo de exacerbaciones de LES durante el embarazo; puede mejorar los desenlaces en LES y la recurrencia de BCC.       | Compatible                                                                       |
| <b>Azatioprina*</b>                                        | Compatible. Atraviesa la placenta pero el hígado del feto carece de la enzima para convertir al metabolito activo                             | Compatible                                                                       |
| <b>Micofenolato mofetil</b>                                | Contraindicado. Aumenta el riesgo de pérdida fetal en el primer trimestre y malformaciones de la línea media                                  | No se recomienda                                                                 |
| <b>Anti-TNF</b>                                            | Compatible. Si se usa durante el embarazo, considere discontinuar durante el tercer trimestre cuando se produce la transferencia placentaria. | Compatible                                                                       |
| <b>Ciclofosfamida*</b>                                     | Contraindicado.                                                                                                                               | Contraindicado                                                                   |
| <b>Ciclosporina y tacrolimus*</b>                          | Compatible                                                                                                                                    | Compatible                                                                       |
| <b>Antiinflamatorios no esteroideos</b>                    | Riesgo de aborto espontáneo durante el primer trimestre                                                                                       | Compatible                                                                       |
| <b>Inhibidor de la enzima convertidora de angiotensina</b> | Contraindicado en el segundo y tercer trimestre por sus efectos renales en el feto                                                            | Datos insuficientes                                                              |
| <b>Rituximab*</b>                                          | Datos insuficientes                                                                                                                           | Seguro                                                                           |

\* Refiérase a la Tabla 2 para información adicional en nefritis lúpica

## **2. Durante el embarazo: monitoreo de la madre y del feto**

Las pacientes con LES deben manejarse mediante un equipo multidisciplinario, que incluya a un reumatólogo, obstetra, especialista en medicina materno fetal, y otros especialistas, dependiendo del compromiso orgánico. Se recomienda un estricto monitoreo obstétrico y reumatológico con evaluaciones periódicas clínicas, de laboratorio y ecografía

obstétrica.<sup>15,22</sup> La evaluación de la actividad de la enfermedad por parte de un reumatólogo debe realizarse cada 4-6 semanas, de acuerdo con el estado de la enfermedad y la estratificación de riesgos, para poder reconocer precozmente los signos de exacerbación de la enfermedad o complicaciones del embarazo. Inicialmente, deben identificarse los factores predictivos de desenlaces adversos del embarazo (DAEs). Se sugiere prestar especial atención a la presión arterial, recuento sanguíneo, la función renal y hepática, análisis de orina y proteinuria en las consultas de control. Los anticuerpos anti-dsDNA y complemento C3 y C4 deberán medirse trimestralmente.<sup>15,23</sup>

## **Evaluación de la actividad de la enfermedad y exacerbaciones del LES**

Reconocer las exacerbaciones de la enfermedad durante el embarazo pudiera ser difícil debido a los cambios fisiológicos que se producen y que pueden solaparse con las características clínicas y de laboratorio del LES activo.<sup>9</sup> Por lo tanto, los datos clínicos y los hallazgos de laboratorio en las pacientes embarazadas con LES, deberán interpretarse con cautela. Durante el embarazo normal, suelen presentarse trombocitopenia, anemia leve y aumentos en el índice de sedimentación globular. Los niveles de complemento son menos confiables para identificar o respaldar la sospecha de actividad de la enfermedad, debido a que aumentan fisiológicamente durante el embarazo, a pesar de que una reducción e25% en los niveles de C3 y C4 con relación a los niveles basales y un aumento en los anticuerpos anti-dsDNA, pueden ser indicadores útiles para diferenciar entre complicaciones tales como preeclampsia y actividad de LES.<sup>24</sup>

Se han sugerido índices modificados para el embarazo, para medir la actividad de la enfermedad, tomando en consideración los cambios fisiológicos de la gestación y las morbilidades que pudieran parecerse a LES.<sup>25-28</sup> En la práctica clínica, los reumatólogos estas no utilizan de rutina estas herramientas; por otra parte, indicadores tales como compromiso orgánico nuevo, aumento de las manifestaciones conocidas de la enfermedad, o cambio del medicamento inmunosupresor, se consideran sugestivos de una exacerbación del LES.<sup>20</sup>

El objetivo fundamental del manejo pacientes con LES durante el embarazo es mantener la enfermedad en remisión y tratar las exacerbaciones para minimizar los efectos de la enfermedad materna sobre los desenlaces del embarazo, sin lesionar al feto. Sin embargo, aun cuando la actividad del lupus esté controlada, pueden siempre presentarse desenlaces perinatales desfavorables.<sup>29</sup>

Las exacerbaciones de la enfermedad se manejan con glucocorticoides no fluorados que son desactivados por la 11<sup>2</sup>-hidroxisteroide deshidrogenasa placentaria, limitando así la exposición fetal.<sup>30</sup> En caso de actividad severa, pueden administrarse pulsos de metilprednisolona. Aun cuando los glucocorticoides se consideran seguros en el embarazo, se han reportado nacimientos prematuros y hendidura orofacial en embarazos expuestos a dosis equivalente de prednisona > 20 mg/día; se recomienda reducir las dosis en cuanto sea posible.<sup>15, 31,32</sup> La introducción temprana o el aumento en las dosis de agentes inmunosupresores compatibles con el embarazo, tales como azatioprina y tacrolimus es una estrategia para controlar la actividad de la enfermedad y evitar la exposición a altas dosis de esteroides. El metotrexato, la leflunomida y el ácido micofenólico, deben evitarse en virtud de su teratogenicidad conocida o potencial. La ciclofosfamida se asocia a un alto riesgo o pérdida fetal, por lo cual deberá evitarse durante el primer trimestre y reservarse solamente en caso de enfermedad que amenace la vida de la paciente, para el segundo o tercer trimestre.<sup>14,15</sup> El rituximab no se ha asociado con ninguna malformación fetal

específica en madres expuestas al medicamento antes de la concepción o al inicio del embarazo, aun cuando su uso al final del embarazo aumenta el riesgo de depleción de las células B en los neonatos expuestos en útero.<sup>35</sup> Hay pocos datos disponibles sobre la seguridad de belimumab durante el embarazo.<sup>21</sup>

## **Hidroxiclороquina para todas las mujeres embarazadas con LES**

La hidroxiclороquina es un antimalárico ampliamente utilizado en el embarazo, con un buen perfil de seguridad. Hasta el momento no se han reportado malformaciones, restricciones del crecimiento intrauterino ni toxicidad ocular en los fetos expuestos en útero.<sup>36</sup> Estudios recientes han demostrado que el uso de hidroxiclороquina es beneficioso tanto para la madre como para el neonato; la recomendación es que todas las mujeres deben iniciar o continuar el uso de hidroxiclороquina durante todo el embarazo.<sup>14</sup> Se ha observado el uso de una dosis promedio más baja de prednisona y una reducción en el riesgo de exacerbaciones durante todo el embarazo, en mujeres con LES tratadas con hidroxiclороquina.<sup>38</sup> La discontinuación de la HCQ se ha asociado con una mayor actividad del lupus y mayores índices de exacerbaciones durante el embarazo.<sup>37</sup>

Además de la prevención de exacerbaciones, se ha reportado un efecto benéfico sobre partos pretérmino y RCIU en embarazos de pacientes con LES expuestas a HCQ.<sup>39</sup> Más aun, un estudio retrospectivo de un solo centro, que incluyó a 151 pacientes embarazadas, reportó menores tasas de preeclampsia entre las embarazadas con LES que recibieron tratamiento con HCQ, en comparación con el grupo no tratado (7,5 vs 19,7%,  $p=0,032$ ). Adicionalmente, la HCQ atraviesa la barrera placentaria y por ende ofrece beneficios adicionales al prevenir complicaciones neonatales específicas, tales como el bloqueo cardíaco congénito.

No obstante, las concentraciones séricas de HCQ son muy variables en cada trimestre, debido a los cambios fisiológicos del embarazo y esta variación puede afectar los desenlaces del embarazo. Un estudio observacional reciente examinó los niveles de HCQ en 50 pacientes embarazadas con enfermedades autoinmunes y demostró que las mujeres con niveles promedio de HCQ de 100 ng/ml o menos, tuvieron una mayor frecuencia de partos prematuros (83% vs 21%,  $p=0,01$ ).<sup>26</sup>

## **Aspirina a dosis baja (ADB) y riesgo de preeclampsia**

La preeclampsia se presenta en un 2-8% de los embarazos entre la población general. La nefritis lúpica, el LES y aPL/SAP son factores de riesgo para preeclampsia, incrementando el riesgo en un 14% en comparación con las mujeres sanas.<sup>1,41</sup> Un metaanálisis de estudios aleatorizados controlados mostró que la aspirina a bajas dosis antes de la semana 16 de gestación se asoció con una mayor reducción del riesgo de preeclampsia pretérmino (RR 0,11, CI 0,04-0,33) entre mujeres de alto riesgo.<sup>42</sup> En un metaanálisis posterior, que incluyó embarazos con una velocimetría de flujo con Doppler de las arterias uterinas anormal, la administración de ABD antes de la semana 16 de gestación redujo el riesgo de preeclampsia (RR 0,6, CI 0,27-0,83) y de preeclampsia severa (RR 0,3, CI 0,11-0,69).<sup>43</sup> De acuerdo con esta evidencia, se recomienda el inicio temprano de la ABD (81-100 mg/día) en mujeres con un riesgo absoluto de preeclampsia > 8%; se debe promover el uso de ABD en todos los embarazos de pacientes con LES y/o SAP, como tratamiento efectivo para la prevención de la preeclampsia.<sup>44</sup> La ABD pareciera ser un medicamento seguro tanto para la madre como para el feto, pues no se ha observado ningún riesgo significativo de

sangrado materno o fetal, ni asociación con cierre prematuro del conducto arterioso.<sup>44,45</sup> A pesar de su posibles beneficios y seguridad, hay una subutilización de la aspirina a bajas dosis en los embarazos de pacientes con LES.<sup>46</sup>

### **Monitoreo fetal**

El uso de ecografía obstétrica a intervalos específicos es importante para evaluar la anatomía y el crecimiento fetal, el líquido amniótico y el flujo placentario. La evaluación con ecografía Doppler de las arterias umbilicales y uterinas, al comienzo del segundo trimestre (20-24 semanas de gestación) es de utilidad para el tamizaje de problemas relacionados con insuficiencia placentaria, tales como RCIU y preeclampsia.<sup>47</sup> La pulsatilidad de la arteria uterina durante este período es una prueba sensible y específica para preeclampsia y para determinar un tamaño pequeño para la edad gestacional, en mujeres con LES.<sup>48,49</sup> La ecografía Doppler umbilical es más precisa para evaluar la función placentaria, identificando diversas alteraciones tales como flujo diastólico ausente o reverso, o aumento de la resistencia.<sup>23</sup> La frecuencia de la vigilancia fetal utilizando ecografía Doppler y biometría durante el tercer trimestre, deberá diseñarse a la medida de acuerdo con la condición del feto, para determinar el momento oportuno para el parto y reducir la mortalidad perinatal.<sup>14,50</sup>

### **3. Después del embarazo: vigilancia postparto, lactancia y anticoncepción**

El puerperio se considera un período de alto riesgo de exacerbaciones del lupus. Recientemente se describió en un análisis retrospectivo de 398 embarazos en mujeres con LES de la Cohorte Hopkins Lupus un incremento en los índices de exacerbaciones en los 3 primeros meses postparto, en contraste con pacientes no embarazadas (HR 1,48; CI 1,07-1,95). El tratamiento con hidroxicloroquina mitigó el riesgo de exacerbaciones durante el embarazo logrando tasas similares a las de pacientes no embarazadas con LES.<sup>38</sup> Ruiz-Irastorza reportó previamente observaciones similares a las 6 semanas postparto.<sup>51</sup> Una mayor actividad de la enfermedad a los 6 y a los 12 meses posparto, en comparación con el tercer trimestre y a las 6 semanas postparto, se reportó en una cohorte prospectiva de 145 embarazos, subrayando la importancia de la vigilancia postparto.<sup>52</sup>

Por lo tanto, se recomienda el seguimiento por reumatología y la continuación del tratamiento con HCQ durante el postparto. Los reumatólogos deberán garantizar la compatibilidad de los medicamentos con la lactancia y promover la adherencia a tratamiento para el control de la enfermedad. La anticoncepción deberá discutirse a finales del embarazo y/o en el postparto con todas las pacientes. Debe darse preferencia a los métodos anticonceptivos altamente efectivos para reducir el riesgo de embarazos no planificados. Deberán adoptarse medidas anticonceptivas específicas, de acuerdo con la actividad de la enfermedad y el riesgo de trombosis.<sup>14,15</sup>

### **Escenarios especiales de alto riesgo**

#### **a) Nefritis lúpica y embarazo**

La nefritis lúpica (NL) es una de las condiciones que suele acarrear un aumento de la morbilidad y de la mortalidad durante el embarazo. La NL puede tener un impacto adverso sobre el embarazo, mientras que el embarazo mismo puede aumentar el riesgo de falla renal. Durante el embarazo, 26% de las mujeres con LES presentan una exacerbación del lupus y 16% una exacerbación renal.<sup>53</sup> Una enfermedad renal activa al momento de la concepción es el factor predictivo más importante de exacerbación renal, aun cuando el

riesgo de NL persiste en mujeres con enfermedad inactiva dentro el año siguiente a la concepción.<sup>54</sup> Más aún, al menos la mitad de las mujeres con NL desarrollarán enfermedad renal crónica en los próximos 10 años.<sup>55</sup>

### **Desenlaces perinatales en nefritis lúpica**

Se ha reportado una mayor incidencia de complicaciones maternas y partos pretérmino en mujeres con LES y nefritis lúpica, en comparación con pacientes sin antecedentes de compromiso renal.<sup>56</sup> Sin embargo, datos recientes han demostrado que el riesgo se relaciona con la actividad de la NL al inicio del embarazo, no con la nefritis lúpica como tal. Un estudio prospectivo en una cohorte de 119 embarazos en pacientes con lupus reportó una mayor tasa de complicaciones maternas, específicamente exacerbaciones renales, en pacientes con antecedentes de nefritis lúpica (50% vs 27,7%,  $p=0,015$ ), pero no se observaron diferencias después de excluir a las pacientes con exacerbaciones renales durante los 6 meses previos al embarazo.<sup>57</sup> Wagner encontró que la NL activa al inicio de la concepción, representa un factor de alto riesgo de complicaciones maternas tales como preeclampsia, eclampsia y síndrome de HELLP. Para el bebé, las complicaciones más comunes fueron aborto espontáneo, pequeño para la edad gestacional, RCIU, parto pretérmino y mortinato.<sup>56</sup> Un estudio prospectivo multicéntrico en 71 embarazos (78,9% con remisión renal completa antes del embarazo) no encontró un aumento del riesgo de exacerbaciones renales durante el embarazo en pacientes con nefritis lúpica estable que recibieron asesoría durante el embarazo.<sup>58</sup> Por lo tanto, la NL activa, mas no la inactiva, es el principal factor de riesgo de malos desenlaces materno-fetales. La asesoría del embarazo es esencial para aconsejar a las pacientes sobre un embarazo, siempre y cuando la NL esté inactiva y estén recibiendo tratamiento compatible con el embarazo.

Cabe destacar que la nefritis lúpica es un factor de riesgo de complicaciones en el embarazo por hipertensión; por lo tanto, se recomienda ofrecer una asesoría pre-concepción, guiada por un equipo multidisciplinario con experiencia.<sup>59</sup>

### **Nefritis lúpica activa y/o preeclampsia: diagnóstico diferencial**

La preeclampsia es un síndrome específico del embarazo, caracterizado por hipertensión y proteinuria, que se inicia en la segunda mitad del embarazo. Se considera que su origen se debe a una angionénesis disfuncional que altera el desarrollo de la placenta, lo cual enfatiza el papel fundamental de la placenta en el desarrollo de la preeclampsia. Un metaanálisis de embarazos en pacientes con lupus mostró una tasa de preeclampsia de 7,8%, pero otros estudios sugieren que puede ser el doble, especialmente en mujeres con nefritis.<sup>53,60</sup>

El diagnóstico de la NL durante el embarazo puede ser difícil porque comparte características que se solapan con preeclampsia, incluyendo hipertensión, proteinuria, trombocitopenia y disfunción renal. Un diagnóstico preciso es crítico, pues el manejo es totalmente diferente según la entidad; si bien es cierto que la NL requiere tratamiento inmunosupresor, en la PE severa, lo indicado pudiera ser inducir el parto.

Antes de las 20 semanas de gestación, las mujeres con LES que presenten hipertensión y elevación de la proteinuria, posiblemente su diagnóstico no sea PE, sino deberá considerarse NL. Sin embargo, después de la semana 20 de gestación, diferenciar entre PE y NL puede resultar una tarea difícil para los reumatólogos y nefrólogos. Los marcadores clínicos y bioquímicos tales como hipertensión, elevación del ácido úrico y enzimas hepáticas elevadas, favorecen el diagnóstico de preeclampsia; por el contrario, la

hipocomplementemia, aumento en los títulos de anti-dsDNA , hematuria, sedimento urinario activo y la presencia de síntomas extra-renales de LES, sugieren la presencia de NL.<sup>62</sup> Un escenario clínico en el que domine la hipertensión y la proteinuria severa sin hematuria, puede sugerir la presencia de preeclampsia (Ver la figura 1).<sup>63</sup>

Figura 1. Algoritmo para el diagnóstico diferencial entre exacerbación de nefritis lúpica y preeclampsia antes de las 20 semanas

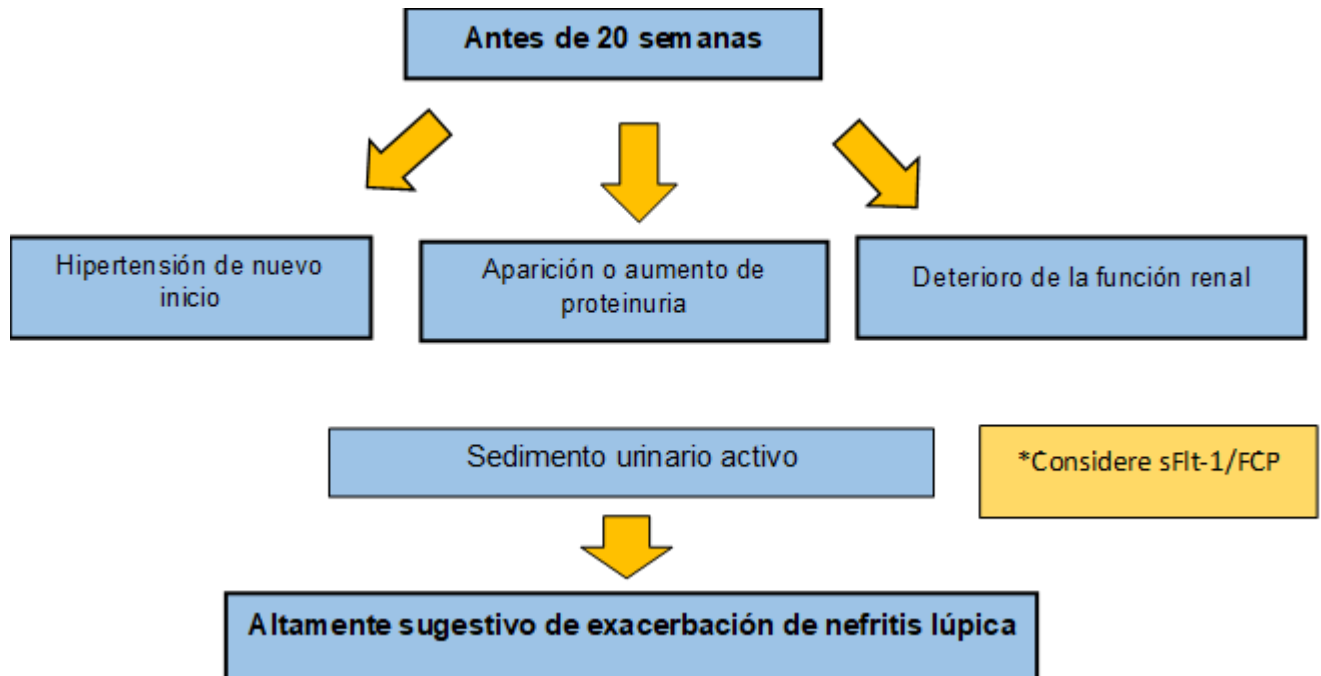

Figura 1. Antes de la semana 20, la aparición o el deterioro de proteinuria y de hipertensión, muy probablemente serán indicadores de exacerbación de nefritis lúpica. \*Los factores angiogénicos y antiangiogénicos podría ayudar a diferenciar una exacerbación de la presencia de preeclampsia.

Desde la mitad del segundo trimestre hasta el tercer trimestre, la aparición o deterioro de la proteinuria, hipertensión y deterioro de la función renal, pueden deberse a 3 posibilidades: preeclampsia, exacerbación de la NL con superposición de preeclampsia, o solo una exacerbación de la NL (ver la figura 2).

Figura 2. Algoritmo para el diagnóstico diferencial entre exacerbación de nefritis lúpica y preeclampsia después de 26 semanas

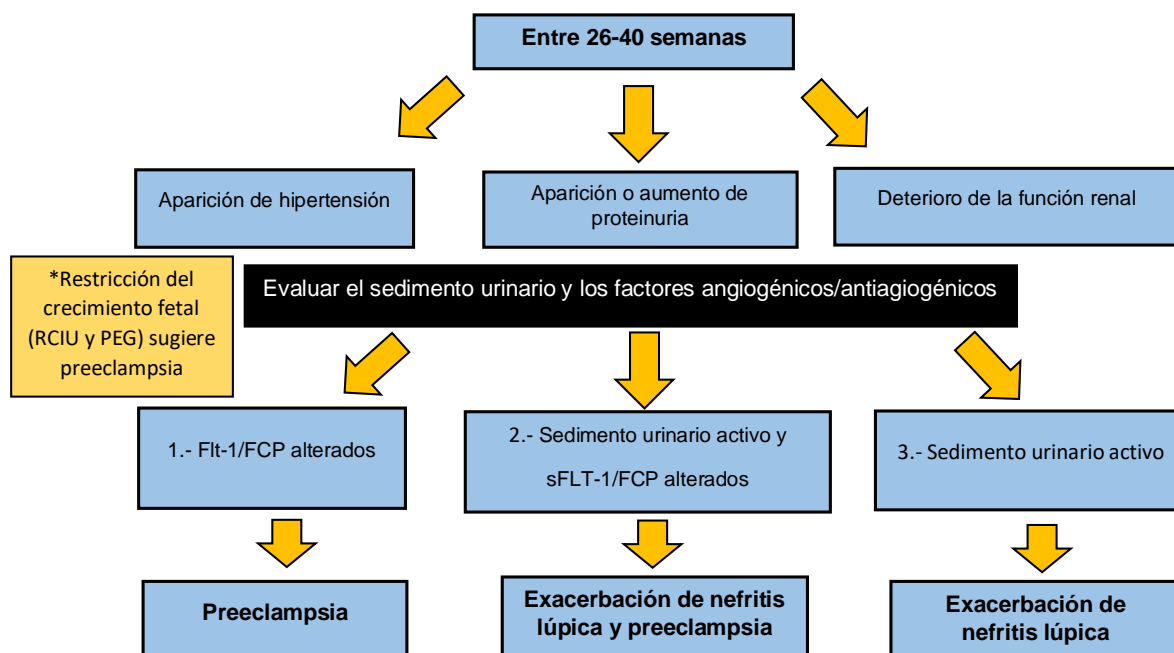

Figura 2. La aparición o empeoramiento de la proteinuria, hipertensión y deterioro de la función renal durante las semanas 26 a 40, deberá alertar sobre 3 posibilidades: 1.- Índice alterado o bajo factor de crecimiento placentario y alto sFlt1 ( $>1872$  pg/ml) y FCP ( $<70.3$  pg/ml) son predictores de inicio de preeclampsia. 2.- Sedimento urinario activo más factores angiogénicos, predictores de la presencia de preeclampsia y exacerbación de la nefritis lúpica. 3.- Sedimento urinario activo con hematuria y bajos niveles de complemento respecto a los niveles basales, sugieren exacerbación de la nefritis lúpica. RCIU: retardo del crecimiento intrauterino; PEG: pequeño para la edad gestacional; sFLT-1: Tirosina quinasa-1 soluble similar a fms; FCP: factor de crecimiento placentario  
\*Siempre correlacionar con los hallazgos de la ecografía fetal.

Los nuevos marcadores angiogénicos tales como tirosina-cinasa 2 similar al fms soluble (s-FLT-1), endoglina soluble, y el factor de crecimiento placentario (FCP) pueden ser útiles para el diagnóstico diferencial. En un estudio longitudinal, observacional de 276 mujeres embarazadas, con hipertensión crónica y enfermedad renal crónica, se encontró que las menores concentraciones del FCP después de 22 semanas de gestación tenían una alta precisión diagnóstica de PE concomitante.<sup>64</sup>

El estudio PROMISSE evaluó la utilidad de los factores angiogénicos circulantes para predecir DAEs (PE  $<34$  semanas, muerte fetal/neonatal y parto pretérmino  $<30$  semanas)

en 492 mujeres embarazadas con aPL y/o LES estable. A las 12-15 semanas de gestación, el mayor predictor de DAEs severos fue el nivel de sFLT-1 (OR 12,3, IC 95% 3,5-84,8), en tanto que el índice sFlt-1/FCP entre las semanas 16-19 fue más predictivo de DAEs severos (OR 31,3, IC 95% 8,0 – 121,9). El mayor riesgo fue en mujeres con un FCP en el cuartil más bajo, y niveles de sFLT1 en el cuartil más alto (OR 31,1, IC 95% 8,0-121,9; PPV 58%; NPV 95%).<sup>65</sup> Un estudio posterior confirmó el valor del índice sFLT-1/FCP para predecir la preeclampsia y el RCIU en 44 embarazos en mujeres con LES.<sup>66</sup>

De manera similar, se ha reportado un mayor índice sFLT-1/FCP durante el tercer trimestre en mujeres con preeclampsia versus pacientes con enfermedad renal crónica.<sup>67</sup> Por lo tanto, la medición del índice sFlt-1/FCP pudiera ser clínicamente útil para descartar preeclampsia, no solamente en NL de nuevo inicio, sino también en otras formas de glomerulonefritis con hipertensión.

Los hallazgos por ecografía Doppler también pueden ser de utilidad para hacer un diagnóstico diferencial entre PE y exacerbaciones de LES. En un estudio de cohorte prospectivo, el índice medio de pulsatilidad de las arterias uterinas a las 32-34 semanas fue mayor en pacientes con PE y/o RCIU, en comparación con las exacerbaciones de la NL.<sup>68</sup>

En general, el diagnóstico de la preeclampsia es clínico. Sin embargo, deberá considerarse la toma de una biopsia renal, cuando se sospeche NL u otra patología glomerular primaria. A pesar de que la biopsia renal durante el embarazo es un tema controversial, deberá realizarse en casos en donde las decisiones sobre tratamiento pudieran estar regidas por los hallazgos histopatológicos, especialmente cuando se sospeche NL. En una serie de casos de 11 mujeres embarazadas que se sometieron a biopsia renal a las 16 semanas por sospecha de exacerbación de la NL, los hallazgos de la biopsia renal cambiaron su manejo en todas, salvo en una paciente, sin aparentes complicaciones para la madre o el feto.<sup>68</sup> Estas observaciones resaltan el impacto potencial de la biopsia renal sobre las decisiones de tratamiento en mujeres embarazadas con NL.

Durante el primer trimestre se considera que la biopsia renal es de bajo riesgo, pues la frecuencia de complicaciones es similar a la de mujeres no gestantes. El mayor riesgo se observa entre las semanas 20-32 porque cualquier intervención pudiera desencadenar un parto pretérmino.

### **Manejo de la nefritis lúpica en el embarazo**

El manejo y el monitoreo del embarazo en mujeres con LES con NL activa y preeclampsia representa un desafío, inclusive para el equipo médico más experto. Los reumatólogos y nefrólogos deberán trabajar juntos en el manejo de estas pacientes, a fin de mejorar los desenlaces del embarazo.

Dependiendo de la edad gestacional a la cual se presente la NL, pueden considerarse 3 escenarios probables: tratamiento guiado por biopsia renal, inicio de manejo empírico para prolongar el embarazo, o terminación del embarazo. La decisión deberá estar dirigida a reducir la morbilidad y mortalidad tanto de la madre como del bebé.

Puesto que entre un 30-50% de los embarazos son no programados, una pregunta importante es cómo manejar los embarazos en mujeres expuestas inadvertidamente a fármacos teratogénicos. Algunas pacientes eligen la terminación inmediata, mientras que

otras deciden continuar con el embarazo. La fecha de exposición deberá definirse para una valoración adecuada del riesgo.

El tratamiento de mujeres embarazadas con NL es desafiante, dado que se debe considerar el bienestar de dos individuos. Es necesario sopesar el posible daño al feto versus el riesgo de discontinuar el tratamiento y la posibilidad de promover el desarrollo de exacerbaciones.

La lista de medicamentos utilizados en el tratamiento de la NL es amplia, pero la información sobre su uso durante el embarazo es limitada. La Tabla 2 muestra los medicamentos utilizados comúnmente para el tratamiento de la NL durante el embarazo.

Tabla 2. Medicamentos inmunosupresores para el tratamiento de la nefritis lúpica durante el embarazo.<sup>14,15,69,71</sup>

| Medicamento                                         | Principales consideraciones                                                   | Ventajas                                                  | Desventajas                                                                    |
|-----------------------------------------------------|-------------------------------------------------------------------------------|-----------------------------------------------------------|--------------------------------------------------------------------------------|
| <b>Prednisona y glucocorticoides endovenosos</b>    | No hay evidencia de aumento de los defectos congénitos                        | Uso de la menor dosis efectiva                            | Puede generar aumento de peso en la madre y riesgo de diabetes pre-gestacional |
| <b>Glucocorticoides fluorados</b>                   | Deben usarse con precaución                                                   | Solo deben usarse para tratar problemas fetales           | Se metabolizan lentamente en la placenta                                       |
| <b>Azatioprina</b>                                  | La dosis de 1,5-2mg/k/día no aumenta el riesgo de malformaciones              | Puede usarse en recidivas o como terapia de mantenimiento | Supresión de la hematopoyesis                                                  |
| <b>Ciclosporina</b>                                 | No se asocia a malformaciones congénitas. Uso en embarazo a la dosis más baja | No se asocia con malformaciones fetales                   |                                                                                |
| <b>Tacrolimus</b>                                   | Puede administrarse durante el embarazo a la mínima dosis efectiva            | No aumenta el riesgo de malformaciones                    | Parto pretérmino y bajo peso al nacer. Hipercalemia neonatal                   |
| <b>Rituximab</b>                                    | No se asocia con malformaciones fetales                                       | Seguro durante el segundo y tercer trimestres             | Puede producir depleción de las células B y citopenia en el neonato            |
| <b>Ciclofosfamida</b>                               | Su uso puede estar justificado en recidivas severas en el 2º y 3er trimestre  |                                                           |                                                                                |
| <b>Inmunoglobulina endovenosa (gamma globulina)</b> | Cuidado con la sucrosa                                                        | Puede usarse durante todo el embarazo                     |                                                                                |

## **b) Anticuerpos antifosfolípidos y embarazo**

El síndrome antifosfolípidos es uno de los factores que más contribuye a la pérdida del embarazo en mujeres con LES; este se manifiesta como abortos espontáneos recurrentes, muerte fetal o mortinatos.<sup>60</sup> Adicionalmente el SAP predispone a la mujer embarazada a complicaciones tardías del embarazo, asociadas a insuficiencia placentaria, tales como PE y RCIU. Se han reportado complicaciones serias hasta en un 12% de los embarazos en pacientes con lupus. Interesantemente, pueden presentarse desenlaces adversos del embarazo en mujeres con LES con anticuerpos aPL, aun durante la remisión de la enfermedad o con actividad leve.<sup>72</sup>

Los anticuerpos antifosfolípidos afectan la placenta al fijar la  $\alpha_2$  glucoproteína I ( $\alpha_2$  2GPI) expresada constitutivamente en la superficie celular de los trofoblastos, alterando los factores angiogénicos expresados por trofoblastos temprano en la gestación y alterando el desarrollo placentario que favorece los desenlaces adversos.<sup>73</sup>

La prevalencia de anticuerpos aPL en LES es variable y depende del tipo y del isotipo de los anticuerpos. Se ha reportado una prevalencia de 12-44% de anticuerpos anticardiolipina (aCL), 15-34% para anticoagulante lúpico (AL) y 10-19% para anti- $\alpha_2$  2glucoproteína I ( $\alpha_2$  2GPI).<sup>74</sup> También se ha descrito una mayor frecuencia de trombosis y pérdida del embarazo en el SAP asociado a LES en SAP primario. Más aun, el diagnóstico de SAP asociado a LES de la cohorte Hopkins Lupus reportó que los abortos espontáneos se triplicaron, especialmente después de las 20 semanas y éste fue un factor de riesgo independiente de futuras pérdidas del embarazo.<sup>75</sup>

La asociación entre aPL y desenlaces adversos del embarazo (DEA) es diferente para los distintos aPL. Se han definido perfiles serológicos específicos de alto riesgo, debido a una asociación más marcada con DEAs. El anticoagulante lúpico se ha identificado como el principal predictor de DEA y la triple positividad para todos los anticuerpos representa un riesgo particularmente elevado de trombosis y complicaciones en el embarazo.<sup>76</sup> En el estudio PROMISSE, un estudio prospectivo multicéntrico a gran escala de mujeres embarazadas con aPL y/o LES estable, se observó una mayor tasa de DAEs en pacientes con aPL (43,8%) en comparación con 15,4% de pacientes sin aPL; por otra parte, los malos desenlaces del embarazo se asociaron principalmente con pacientes AL positivos. La presencia del AL se identificó como un predictor basal independiente de DAEs (OR 8,32), mientras que ningún otro aPL fue predictor independiente de DAE.<sup>77</sup> El registro EUROAPS también reportó que AL, aislado o en combinación con aCL y/o  $\alpha_2$  2GPI, fue el marcador más sólido de desenlaces obstétricos adversos.<sup>78</sup>

El tratamiento de pacientes embarazadas con aPL depende del perfil de riesgo y de la historia de eventos obstétricos adversos o trombosis. En mujeres con APS durante el embarazo, se recomienda el uso de una terapia combinada con aspirina a bajas dosis y dosis profilácticas de heparina. En caso de antecedentes de trombosis, deberá administrarse la dosis terapéutica de heparina, además de la ABD durante el embarazo, pues los antagonistas de la vitamina K son teratogénicos.<sup>14,15</sup>

A pesar del tratamiento óptimo estándar, 15-20% de los embarazos en mujeres con aPL positivos, sufren de muerte fetal.<sup>79</sup> Se ha sugerido recientemente agregar hidroxicloroquina al tratamiento estándar en APS obstétrico, basados en la evidencia de que aparentemente la HCQ amortigua los efectos dañinos de los aPL sobre el trofoblasto.<sup>80,81</sup> Dos estudios

aleatorizados, controlados en curso, evaluarán el efecto de la HCQ en embarazos de mujeres con aPL/SAP.<sup>79,82</sup>

### **c) Anticuerpos anti-SSA/Ro y anti-SSB/La y lupus neonatal**

Los embarazos expuestos a anti-SSA/Ro y a anti-SSB/La presentan un mayor riesgo de desarrollar lupus neonatal, una enfermedad inmunológica adquirida en forma pasiva, mediada por los anticuerpos maternos. Las manifestaciones incluyen compromiso cutáneo, función hepática anormal y citopenia, que suele resolverse entre los 6 y 8 meses de vida. El bloqueo cardíaco congénito (BCC) es la forma más severa de lupus neonatal, con una tasa de mortalidad del 18% y necesidad de marcapasos en el 70% de los sobrevivientes.<sup>83</sup>

El lupus neonatal es la consecuencia de la transferencia activa de anticuerpos maternos al feto a través del receptor FcRn placentario, a las 11 semanas de gestación.<sup>84</sup> Entre las pacientes con anticuerpos anti-SSA/Ro, el riesgo de tener un bebé con BCC es de aproximadamente 1-2%. Sin embargo, en madres que ya hayan tenido un hijo con lupus neonatal o BCC, el riesgo se eleva a 19%.<sup>85</sup> Se han reportado títulos de anticuerpos anti-Ro más elevados en las madres de niños afectados por BCC, en comparación con las madres de niños no afectados.<sup>86</sup>

El mecanismo exacto a través del cual los anticuerpos anti-Ro/La producen la lesión cardíaca no está claro. Una hipótesis es que los antígenos Ro/La intracelulares se translocan hacia la superficie de los cardiomiocitos y pasan por una remodelación fisiológica normal, permitiendo la fijación de estos antígenos por los anticuerpos circulantes, desencadenando posteriores respuestas proinflamatorias y fibróticas. La formación de complejo inmune sobre los cardiocitos fagocíticos puede alterar su depuración por parte de los cardiocitos sanos, obstaculizando una función que es crítica para el desarrollo normal del corazón fetal.<sup>87</sup> También se han encontrado alteraciones genéticas asociadas a HLA.

El bloqueo cardíaco congénito se diagnostica principalmente durante el embarazo y típicamente dentro de un cierto marco de tiempo. Se han reportado casos aislados desde la semana 16, pero el 75% de los casos se diagnostican entre las semanas 20-29.<sup>84</sup> El bloqueo cardíaco congénito suele ir precedido de grados menores de demoras en la conducción que pueden revertirse con tratamiento precoz. Se recomienda un monitoreo estricto de las mujeres embarazadas con positividad anti-SSA/Ro y/o anti-SSB/La, mediante ecocardiografía fetal seriada entre las 16 y 26 semanas de gestación.<sup>14,15,88</sup> La detección de un defecto temprano de conducción como un intervalo PR prolongado, deberá considerarse como una señal de peligro.

Se han evaluado diversas estrategias terapéuticas para el BCC. Los esteroides fluorados tales como la dexametasona, atraviesan la barrera placentaria y pudieran mitigar la inflamación en niños afectados por BCC autoinmune, pero los datos acerca de la eficacia del tratamiento o de la profilaxis son contradictorios. Hasta la fecha no existe evidencia de que la dexametasona mejore la mortalidad y la morbilidad o prevenga la progresión del bloqueo cardíaco; por lo tanto, la decisión de usar este tratamiento deberá sopesarse contra el riesgo potencial de toxicidad materna y fetal.<sup>87,89,90</sup>

Actualmente se está investigando el tratamiento preventivo para mujeres embarazadas con positividad para anti-SSA/Ro y/o anti-La/SSB. La administración de hidroxicloroquina durante el embarazo, se ha asociado a una disminución del lupus neonatal recurrente en

estudio retrospectivos.<sup>91</sup> Recientemente, un estudio clínico multicéntrico, abierto, de un solo brazo, fase 2, mostró una reducción de >50% en la recidiva de BCC en madres que recibieron HCQ 400 mg/día, comenzando 10 semanas antes de la gestación, confirmando así su papel para prevenir el BCC en pacientes de alto riesgo.<sup>92</sup>

La Figura 3 resume un algoritmo para el abordaje del embarazo en pacientes con LES.

Figura 3. Abordaje del embarazo en mujeres con LES

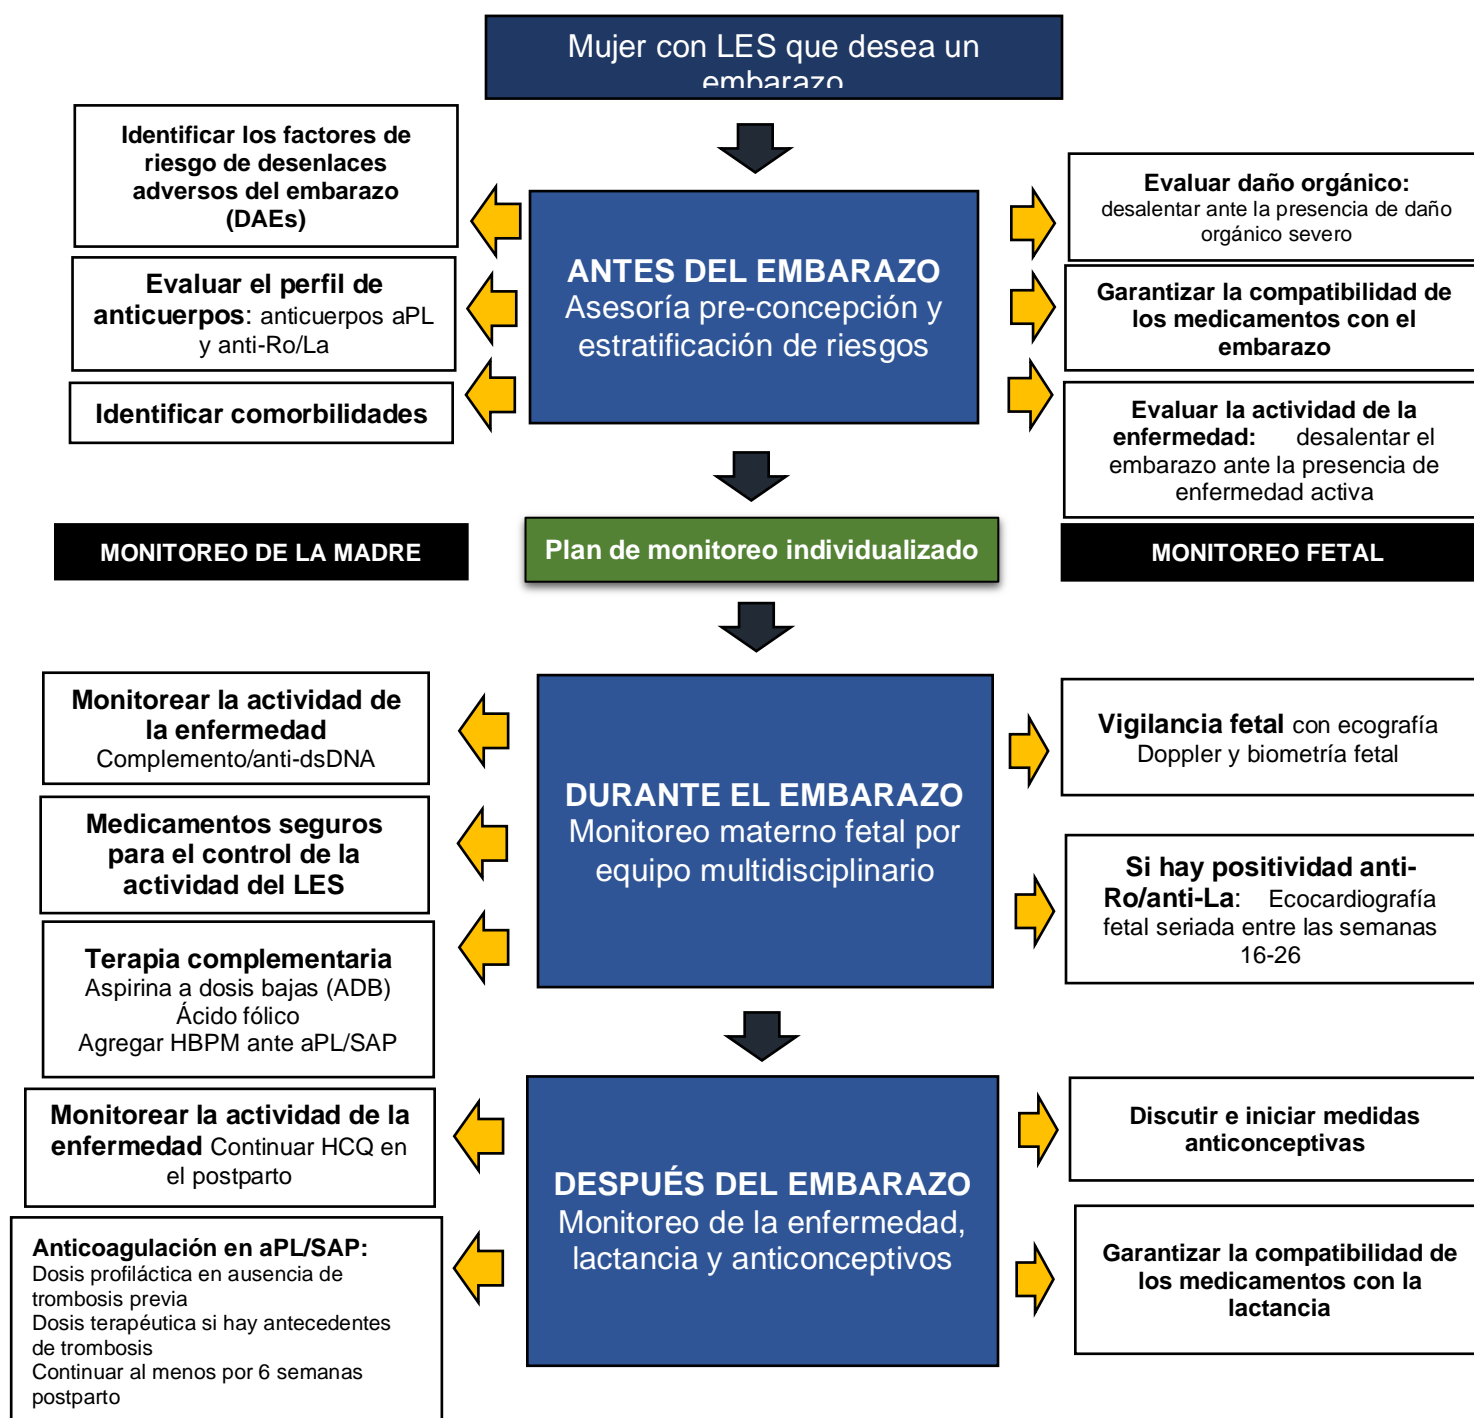

Abordaje estratégico antes, durante y después del embarazo, en mujeres con LES. Información adaptada de <sup>14,15</sup>

DAE: desenlaces adversos del embarazo; aPL: antifosfolípido; SAP: síndrome antifosfolípido; HCQ: hidroxicloroquina; HBPM: heparina de bajo peso molecular; ADB: aspirina a dosis bajas

## Conclusiones

El embarazo y LES están estrechamente relacionados pues la enfermedad activa se asocia con un mayor riesgo de desenlaces adversos del embarazo y cambios relacionados con el embarazo que pueden impactar la enfermedad materna, desencadenando exacerbaciones de la enfermedad. Los desenlaces del embarazo se pueden mejorar planificando la concepción durante períodos de enfermedad estable, mientras se continúa con medicamentos compatibles con el embarazo.

Aparte de la actividad de la enfermedad, la presencia de aPL y anticuerpos anti-SSA/Ro, puede afectar negativamente el embarazo, aumentando el riesgo de complicaciones maternas y fetales, como aborto espontáneo, complicaciones gestacionales tardías y lupus neonatal; por lo tanto, idealmente se deberá identificar la presencia de aPL y de anticuerpos anti-SSA/Ro antes del embarazo, a fin de implementar una estrategia preventiva y mantener una estricta vigilancia materno fetal.

La administración de hidroxicloroquina durante el embarazo es una estrategia importante para reducir el riesgo de exacerbaciones de la enfermedad materna y prevenir el bloqueo cardíaco congénito recurrente. Investigaciones recientes también han mostrado el posible beneficio de agregar la hidroxicloroquina al tratamiento estándar, en mujeres con aPL/aPS. Posiblemente los estudios clínicos en marcha podrán esclarecer este tema. Dado el mayor riesgo de preeclampsia en embarazos de pacientes con LES, se recomienda iniciar la aspirina a bajas dosis antes de la semana 16.

El embarazo en pacientes con LES con NL representa un importante desafío, tanto para el nefrólogo, como para el reumatólogo, debido al mayor riesgo de desenlaces perinatales adversos y complicaciones asociadas a la hipertensión durante el embarazo. La NL activa puede no diferenciarse clínicamente de la preeclampsia, especialmente después de las 20 semanas; sin embargo, nuevas herramientas como el índice sFLT1/FCP y el índice de pulsatilidad medio de las arterias uterinas, son de utilidad para diferenciar entre una y otra condición.

El monitoreo de la madre y del feto durante el embarazo, por un equipo multidisciplinario con experiencia, debe ser el estándar de atención en mujeres embarazadas con LES.

## PUNTOS CENTRALES

- El monitoreo cuidadoso de las pacientes con LES durante el embarazo, por parte de un equipo multidisciplinario, es la clave para prevenir complicaciones materno fetales.
- Siempre se deben sopesar los riesgos potenciales para el feto, contra los beneficios del control de la enfermedad, cuando se tomen decisiones relacionadas con el tratamiento en pacientes embarazadas con LES.
- En contraposición a lo que se creía en el pasado, en pacientes con enfermedad inactiva o estable, el embarazo es más seguro tanto para la madre como para el bebé, lográndose buenos desenlaces en alrededor del 80% de las pacientes.
- Deben evaluarse nuevos biomarcadores para identificar a las pacientes de alto riesgo.

## CONFLICTOS DE INTERÉS

Los autores no tienen conflictos de interés que declarar.

## REFERENCIAS

1. Clowse ME, Jamison M, Myers E, James AH. A national study of the complications of lupus in pregnancy. *Am J Obstet Gynecol*. 2008;199:127.e1-6. DOI: 10.1016/j.ajog.2008.03.012
2. Lateef A, Petri M. Systemic Lupus Erythematosus and pregnancy. *Rheum Dis Clin North Am*. 2017;43:215-226. DOI: 10.1016/j.rdc.2016.12.009
3. Bundhun PK, Soogund MZ, Huang F. Impact of systemic lupus erythematosus on maternal and fetal outcomes following pregnancy: a meta-analysis of studies published between years 2001–2016. *J Autoimmun*. 2017;79:17–27. DOI: 10.1016/j.jaut.2017.02.009
4. Vinet E, Clarke AE, Gordon C, et al. Decreased live births in women with systemic lupus erythematosus. *Arthritis Care Res*. 2011;63:1068-1072. DOI: 10.1002/acr.20466
5. Tavakolpour S, Rahimzadeh G. New Insights into the Management of Patients with Autoimmune Diseases or Inflammatory Disorders During Pregnancy. *Scand J Immunol*. 2016;84:146-149. DOI: 10.1111/sji.12453
6. Østensen MM, Villiger PM, Förger F. Interaction of pregnancy and autoimmune rheumatic disease. *Autoimmun Rev*. 2012;11:A437-446. DOI: 10.1016/j.autrev.2011.11.013
7. Cortés-Hernández J, Ordi-Ros J, Paredes F, Casellas M, Castillo F, Vilardell-Tarres M. Clinical predictors of fetal and maternal outcome in systemic lupus erythematosus: a prospective study of 103 pregnancies. *Rheumatology (Oxford)*. 2002;41:643–650. DOI: 10.1093/rheumatology/41.6.643
8. Lazzaroni MG, Dall'Ara F, Fredi M, Nalli C, Reggia R, Lojano A, et al. A comprehensive review of the clinical approach to pregnancy and systemic lupus erythematosus. *J Autoimmun*. 2016;74:106-117. DOI: 10.1016/j.jaut.2016.06.016
9. Clowse ME. Lupus activity in pregnancy. *Rheum Dis Clin North Am*. 2007;33:237–252. DOI: 10.1016/j.rdc.2007.01.002
10. Jara LJ, Medina G, Cruz-Dominguez P, Navarro C, Vera-Lastra O, Saavedra MA. Risk factors of systemic lupus erythematosus flares during pregnancy. *Immunol Res*. 2014;60:184-192. DOI: 10.1007/s12026-014-8577-1
11. Clowse ME, Magder LS, Witter F, Petri M. The impact of increased lupus activity on obstetric outcomes. *Arthritis Rheum*. 2005;52:514–521.
12. Andrade RM, McGwin G Jr, Alarcon GS, M L Sanchez ML, Bertoli AM, Fernández M, et al. Predictors of post-partum damage accrual in systemic lupus erythematosus: data from LUMINA, a multiethnic US cohort (XXXVIII). *Rheumatology (Oxford)*. 2006;45:1380-1384. DOI: 10.1093/rheumatology/kel222
13. Jara LJ, Medina G, Cruz-Dominguez P, Navarro C, Vera-Lastra O, Saavedra MA. Risk factors of systemic lupus erythematosus flares during pregnancy. *Immunol Res*. 2014;60:184-192. DOI: 10.1007/s12026-014-8577-1.
14. Andreoli L, Bertsias GK, Agmon-Levin N, Brown S, Cervera R, Costedoat-Chalumeau N, et al. EULAR recommendations for women's health and the management of family planning, assisted reproduction, pregnancy and menopause

- in patients with systemic lupus erythematosus and/or antiphospholipid syndrome. *Ann Rheum Dis* 2017;76:476-485. DOI: 10.1136/annrheumdis-2016-209770
15. Sammaritano L, Bonnie L Bermas, Eliza E Chakravarty, Christina Chambers C, Clowse M, Lockshine M, et al. 2020 American College of Rheumatology Guideline for the management of Reproductive Health in Rheumatic and Musculoskeletal diseases. *Arthritis Rheumatol.* 2020;72(4):529-556. DOI: 10.1002/art.41191.
16. Mehret Birru Talabi, Megan E B Clowse, Susan J Blalock, Megan Hamm, Sonya Borrero. Perspectives of Adult Rheumatologists Regarding Family Planning Counseling and Care: A qualitative study. *Arthritis Care Res (Hoboken)* 2020 Mar;72:452-458. DOI: 10.1002/acr.23872.
17. Njagu R, Criscione-Schreiber LG, Eudy A, Snyderman A, Clowse M. Impact of a multifaceted educational program to improve provider skills for lupus pregnancy planning and management: a mixed-methods approach. *ACR Open Rheumatol.* 2020;2:378-387. DOI: 10.1002/acr2.11147. Epub 2020 Jun 2
18. Le Huong D, Wechsler B, Vauthier-Brouzes D, Seebacher J, Lefebvre G, Bletry O, et al. Outcome of planned pregnancies in systemic lupus erythematosus: a prospective study on 62 pregnancies. *Br J Rheumatol.* 1997;36:772-7. DOI: 10.1093/rheumatology/36.7.772.
19. Wei Q, Ouyang Y, Zeng W, Duan L, Ge J, Liao H. Pregnancy complicating systemic lupus erythematosus: a series of 86 cases. *Arch Gynecol Obstet.* 2011;284:1067-71. DOI: 10.1007/s00404-010-1786-5.
20. Sammaritano L. Management of Systemic Lupus Erythematosus during pregnancy. *Annu Rev Med.* 2017;68:271-285. DOI: 10.1146/annurev-med-042915-102658
21. Mehret Birru Talabi, Megan E B Clowse. Antirheumatic medications in pregnancy and breastfeeding. *Curr Opin Rheumatol.* 2020;32:238-246. DOI:10.1097/BOR.0000000000000710
22. Ian Giles, Chee-Seng Yee, Caroline Gordon. Stratifying management of rheumatic disease for pregnancy and breastfeeding. *Nat Rev Rheumatol* 2019;15:391-402. DOI: 10.1038/s41584-019-0240-8.
23. Ramires de Jesus G, Mendoza-Pinto C, Ramires de Jesus N, Cunha Dos Santos F, Mendes Klumb E, García Carrasco M, et al. Understanding and managing pregnancy in patients with lupus. *Autoimmune Dis.* 2015;2015:943490. DOI:10.1155/2015/943490
24. Stojan G, Baer A. Flares of systemic lupus erythematosus during pregnancy and the puerperium: prevention, diagnosis and management. *Expert Rev Clin Immunol.* 2012;8:439-53. DOI: 10.1586/eci.12.36.
25. Andreoli L, Gerardi MC, Fernandes M, Bortoluzzi A, Bellando-Randone S, Brucato A, et al. Disease activity assessment of rheumatic diseases during pregnancy: a comprehensive review of indices used in clinical studies. *Autoimmun Rev.* 2019;18:164-176. DOI: 10.1016/j.autrev.2018.08.008.
26. Buyon JP, Kalunian KC, Ramsey-Goldman R, Petri MA, Lockshin MD, Ruiz-Irastorza G, et al. Assessing disease activity in SLE patients during pregnancy. *Lupus* 1999;8:677-84. DOI: 10.1191/096120399680411272.
27. Yee CS, Akil M, Khamashta M, Bessant R, Kilding R, Giles I, et al. The BILAG2004-pregnancy index is reliable for assessment of disease activity in pregnant SLE patients. *Rheumatology (Oxford).* 2012;51:1877-80. DOI: 10.1093/rheumatology/kes158.
28. Ruiz-Irastorza G, Khamashta MA, Gordon C, Lockshin MD, Johns KR, Sammaritano L, et al. Measuring systemic lupus erythematosus activity during pregnancy:

- Validation of the lupus activity index in pregnancy scale. *Arthritis Care Res (Hoboken)*. 2004;51:78–82. DOI:10.1002/art.20081.
29. Pastore DEA, Costa ML, Surita FG. Systemic lupus erythematosus and pregnancy: the challenge of improving antenatal care and outcomes. *Lupus*. 2019;28:1417-1426. DOI:10.1177/0961203319877247.
30. Yang K. Placental 11 beta-hydroxysteroid dehydrogenase: barrier to maternal glucocorticoids. *Rev Reprod*. 1997;2:129–132. DOI: 10.1530/ror.0.0020129.
31. Xiao WL, Liu XY, Liu YS, Zhang DZ, Xue L. The relationship between maternal corticosteroid use and orofacial clefts-a meta-analysis. *Reprod Toxicol*. 2017;69:99-105. DOI: 10.1016/j.reprotox.2017.02.006.
32. Skuladottir H, Wilcox AJ, Ma C, Lammer EJ, Rassmussen SA, Werler M, et al. Corticosteroid use and risk of orofacial clefts. *Birth Defects Res A Clin Mol Teratol*. 2014;100:499-506. DOI: 10.1002/bdra.23248
33. Kwok LW, Tam LS, Zhu T, Leung YY, Li E. Predictors of maternal and fetal outcomes in pregnancies of patients with systemic lupus erythematosus. *Lupus*. 2011;20:829-36. DOI:10.1177/0961203310397967.
34. Borella E, Lojcono A, Gatto M, Andreoli L, Taglietti M, Laccarino L, et al. Predictors of maternal and fetal complications in SLE patients: a prospective study. *Immunol Res*. 2014;60:170-6. DOI: 10.1007/s12026-014-8572-6.
35. Chakravarty EF, Murray ER, Kelman A, Farmer P. Pregnancy outcomes after maternal exposure to rituximab. *Blood*. 2011;117:1499-506. DOI: 10.1182/blood-2010-07-295444.
36. Gaffar R, Pineau CA, Bernatsky S, Scott S, Vinet E. Risk of ocular anomalies in children exposed in utero to antimalarials: a systematic literature review. *Arthritis Care Res (Hoboken)*. 2019;71:1606-1610. DOI: 10.1002/acr.23808
37. Clowse ME, Magder L, Witter F, Petri M. Hydroxychloroquine in lupus pregnancy. *Arthritis Rheum*. 2006;54:3640-7. DOI: 10.1002/art.22159.
38. Eudy AM, Siega-Riz AM, Engel SM, Franseschini N, Green Howard A, Clowse M, et al. Effect of pregnancy on disease flares in patients with systemic lupus erythematosus. *Ann Rheum Dis* 2018;77:855–860. doi: 10.1136/annrheumdis-2017-212535
39. Leroux M, Desveaux C, Parcevaux M, Julliac B, Gouyon JB, Dallay D, et al. 2015. Impact of hydroxychloroquine on preterm delivery and intrauterine growth restriction in pregnant women with systemic lupus erythematosus: a descriptive cohort study. *Lupus*. 2015;24:1384-91. DOI: 10.1177/0961203315591027.
40. Balevic SJ, Cohen-Wolkowicz M, Eudy AM, Green TP, Schanberg L, Clowse M. Hydroxychloroquine levels throughout pregnancies complicated by rheumatic disease: implications for maternal and neonatal outcomes. *J Rheumatol*. 2019;46:57-63. DOI: 10.3899/jrheum.180158.
41. Bartsch E, Medcalf KE, Park AL, Ray JG. Clinical risk factors for preeclampsia determined in early pregnancy: systematic review and meta-analysis of large cohort studies. *BMJ* 2016;19;353:i1753. DOI: 10.1136/bmj.i1753.
42. Roberge S, Villa P, Nicolaides K, Giguere Y, Vainio M, Bakthi A, et al. Early administration of low-dose aspirin for the prevention of preterm and term preeclampsia: a systematic review and meta-analysis. *Fetal Diagn Ther*. 2012;31:141-6. DOI: 10.1159/000336662.
43. Villa PM, Kajantie E, Raikonen K, Pesonen AK, Hämäläinen E, Vainio M, et al. Aspirin in the prevention of pre-eclampsia in high-risk women: a randomized placebo-controlled PREDO Trial and a meta-analysis of randomized trials. *BJOG* 2013;120:64-74. DOI: 10.1111/j.1471-0528.2012.03493.x.

44. Mendel A, Bernatsky SB, Hanly JG, et al. Low aspirin use and high prevalence of preeclampsia risk factors among pregnant women in a multinational SLE inception cohort. *Ann Rheum Dis* 2019; 78:1010–1012. doi: 10.1136/annrheumdis-2018-214434.
45. T. G. Di Sessa, M. L. Moretti, A. Khoury, et al. Cardiac function in fetuses and newborns exposed to low-dose aspirin during pregnancy. *Am J Obstet Gynecol* 1994;171:892-900. doi: 10.1016/s0002-9378(94)70056-7.
46. Schramm AM, Clowse M. Aspirin for prevention of preeclampsia in lupus pregnancy. *Autoimmune Dis* 2014;2014:920467. doi: 10.1155/2014/920467
47. R. Madazli, M. A. Yuksel, M. Oncul, M. Imamoglu, and H. Yilmaz. Obstetric outcomes and prognostic factors of lupus pregnancies. *Arch Gynecol Obstet* 2014 ;289:49-53. doi: 10.1007/s00404-013-2935-4.
48. G. Pagani, R. Reggia, L. Andreoli et al. The role of second trimester uterine artery Doppler in pregnancies with systemic lupus erythematosus. *Prenat Diagn* 2015;35:447-52. doi: 10.1002/pd.4517.
49. D. Le Thi Huong, B. Wechsler, D. Vauthier-Brouzes et al. The second trimester Doppler ultrasound examination is the best predictor of late pregnancy outcome in systemic lupus erythematosus and/or the antiphospholipid syndrome. *Rheumatology (Oxford)* 2006;45:332-8. doi: 10.1093/rheumatology/kei159.
50. Zarko Alfirevic, Tamara Stampalija, Therese Dowswell. Fetal and umbilical Doppler ultrasound in high-risk pregnancies. *Cochrane Database Syst Rev* 2017 13;6:CD007529. DOI: 10.1002/14651858.CD007529.pub4
51. G Ruiz-Irastorza, F Lima, J Alves, M A Khamashta, et al. Increased rate of lupus flare during pregnancy and the puerperium: a prospective study of 78 pregnancies. *Br J Rheumatol* 1996;35:133-8. doi: 10.1093/rheumatology/35.2.133.
52. Götestam Skorpen C, Lydersen S. et al. Disease activity during pregnancy and the first year postpartum in women with systemic lupus erythematosus. *Arthritis Care Res (Hoboken)* 2017;69:1201-1208. doi: 10.1002/acr.23102.
53. Smyth A, Oliveira GH, Lahr BD, Bailey KR, Norby SM, Garovic VD: A systematic review and meta-analysis of pregnancy outcomes in patients with systemic lupus erythematosus and lupus nephritis. *Clin J Am Soc Nephrol* 5: 2060–2068, 2010. doi: 10.2215/CJN.00240110.
54. Moroni G, Andrea Doria, et al. Maternal outcome in pregnant women with lupus nephritis. A prospective multicenter study. *J Autoimmun* 2016;74:194-200. doi: 10.1016/j.jaut.2016.06.012
55. Farooq Z. Rahman, Jessica Rahman Suleiman, et al. Pregnancy outcome in lupus nephropathy. *Arch Gynecol Obstet* 2005;271:222-6. doi: 10.1007/s00404-003-0574-x.
56. Wagner SJ, Craici I, Reed D, et al. Maternal and fetal outcomes in pregnant patients with active lupus nephritis. *Lupus* 2009; 18: 342–347. doi: 10.1177/0961203308097575.
57. Attia DH, Mokbel A, Haggag HM, Naeem N. Pregnancy outcome in women with active and inactive lupus nephritis: a prospective cohort study. *Lupus* 2019;28(7):806-817. doi: 10.1177/0961203319846650
58. Moroni G, Andrea Doria, et al. Maternal outcome in pregnant women with lupus nephritis. A prospective multicenter study. *J Autoimmun* 2016;74:194-200. doi: 10.1016/j.jaut.2016.06.012
59. Collins R, Yusuf S, Peto R. Overview of randomized trials of diuretics in pregnancy. *Br Med J (Clin Res Ed)*. 1985;290(6461):17-23. doi: 10.1136/bmj.290.6461.17.

60. Ostensen M, Clowse M. Pathogenesis of pregnancy complications in systemic lupus erythematosus. *Curr Opin Rheumatol.* 2013;25:591-596. DOI: 10.1097/BOR.0b013e328363ebf7
61. Clowse ME, Magder LS, Witter F, Petri M. The impact of increased lupus activity on obstetric outcomes. *Arthritis Rheum.* 2005;52:514–521. doi: 10.1002/art.20864.
62. Miyamoto T, Hoshino T, Hayashi N, Oyama R, Okunomiya A, Kitamura S, et al. Preeclampsia as a Manifestation of New-Onset Systemic Lupus Erythematosus during Pregnancy: A Case-Based Literature Review. *AJP Rep* 2016;6:e62-7. doi: 10.1055/s-0035-1566245.
63. Maynard S, Guerrier G, Duffy M. Pregnancy in Women With Systemic Lupus and Lupus Nephritis. *Adv Chronic Kidney Dis.* 2019;26:330-337. doi: 10.1053/j.ackd.2019.08.013.
64. Bramham K, Seed PT, Lightstone L, Nelson-Piercy C, Gill C, et al. Diagnostic and predictive biomarkers for pre-eclampsia in patients with established hypertension and chronic kidney disease. *Kidney Int.* 2016;89:874-85. doi: 10.1016/j.kint.2015.10.012.
65. Kim MY, Buyon JP, Guerra MM, et al. Angiogenic factor imbalance early in pregnancy predicts adverse outcomes in patients with lupus and antiphospholipid antibodies: results of the PROMISSE study. *Am J Obstet Gynecol.* 2016;214:108.e1-108.e14. doi: 10.1016/j.ajog.2015.09.066.
66. Rodríguez-Almaraz ME, Herraiz I, Gómez-Arriaga PI, Vallejo P, Gonzalo-Gil E, Usategui A, et al. The role of angiogenic biomarkers and uterine artery Doppler in pregnant women with systemic lupus erythematosus or antiphospholipid syndrome. *Pregnancy Hypertens.* 2018 Jan;11:99-104.
67. Karge A, Beckert L, Moog P, et al. Role of sFlt-1/PIGF ratio and uterine Doppler in pregnancies with chronic kidney disease suspected with pree-eclampsia or HELLP syndrome. *Pregnancy Hypertens* 2020 Sep 17;22:160-166.doi: 10.1016/j.preghy.2020.09.007.
68. Chen TK, Gelber AC, Witter FR, Petri M, Fine DM. Renal biopsy in the management of lupus nephritis during pregnancy. *Lupus.* 2015;24(2):147-154. doi: 10.1177/0961203314551812.
69. Andrea G.Kattah, Vesna D.Garovic. Pregnancy and Lupus Nephritis. *Semin Nephrol.* 2015 Sep;35(5):487-99. doi: 10.1016/j.semnephrol.2015.08.010.
70. Götestam Skorpen C, Hoeltzenbein M, Tincani A, Fischer-Betz R, Elefant E, et al. The EULAR points to consider for use of antirheumatic drugs before pregnancy, and during pregnancy and lactation. *Ann Rheum Dis.* 2016;75:795-810. doi: 10.1136/annrheumdis-2015-208840.
71. Rahman FZ, Rahman J, Al-Suleiman SA, Rahman MS. Pregnancy outcome in lupus nephropathy. *Arch Gynecol Obstet.* 2005;271:222-6. doi: 10.1007/s00404-003-0574-x.
72. Clowse ME, Magder LS, Witter F, Petri M. The impact of increased lupus activity on obstetric outcomes. *Arthritis Rheum.* 2005;52:514–521. doi: 10.1002/art.20864.
73. Carroll TY, Mulla MJ, Han CS, et al. Modulation of trophoblast angiogenic factor secretion by antiphospholipid antibodies is not reversed by heparin. *Am J Reprod Immunol.* 2011;66:286-296. DOI: 10.1111/j.1600-0897.2011.01007.x
74. Biggioggero M, Meroni PL. The geoepidemiology of the antiphospholipid antibody syndrome. *Autoimmun Rev.* 2010;9:A299-304. DOI: 10.1016/j.autrev.2009.11.013.

75. Clowse ME, Magder LS, Witter F, Petri M. Early risk factors for pregnancy loss in lupus. *Obstet Gynecol.* 2006;107:293–299. doi: 10.1097/01.AOG.0000194205.95870.86.
76. Lockshin MD, Kim M, Laskin CA, et al. Prediction of adverse pregnancy outcome by the presence of lupus anticoagulant, but not anticardiolipin antibody, in patients with antiphospholipid antibodies. *Arthritis Rheum.* 2012;64:2311-2318. DOI: 10.1002/art.34402.
77. Buyon JP, Kim MY, Guerra MM, et al. Predictors of pregnancy outcomes in patients with lupus: a cohort study. *Ann Intern Med.* 2015;163:153-163. DOI: 10.7326/M14-2235
78. Alijotas-Reig J, Ferrer-Oliveras R, Ruffatti A, et al. The European Registry on Obstetric Antiphospholipid Syndrome (EUROAPS): A survey of 247 consecutive cases. *Autoimmun Rev.* 2015;14:387-395. DOI: 10.1016/j.autrev.2014.12.010.
79. Rodziewicz M, D'Cruz D. An update on the management of antiphospholipid syndrome. *Ther Adv Musculoskelet Dis* 2020 Apr 27;12:1759720X20910855. doi: 10.1177/1759720X20910855.
80. Albert CR, Schlesinger WJ, Viall CA, et al. Effect of hydroxychloroquine on antiphospholipid antibody-induced changes in first trimester trophoblast function. *Am J Reprod Immunol* 2014; 71:154–164. doi: 10.1111/aji.12184.
81. Bertolaccini ML, Contento G, Lennen R, et al. Complement inhibition by hydroxychloroquine prevents placental and fetal brain abnormalities in antiphospholipid syndrome. *J Autoimmun* 2016;75:30–38.
82. Schreiber K, Breen K, Cohen H, et al. HYdroxychloroquine to improve Pregnancy outcome in women with AnTIphospholipid Antibodies (HYPATIA) protocol: a multinational randomized controlled trial of hydroxychloroquine versus placebo in addition to standard treatment in pregnant women with antiphospholipid syndrome or antibodies. *Semin Thromb Hemost* 2017;43:562–571. doi: 10.1055/s-0037-1603359.
83. Izmirly PM, Rivera TL, Buyon JP. Neonatal Lupus Syndromes. *Rheum Dis Clin North Am.* 2007;33:267-285. doi:10.1016/j.rdc.2007.02.005.
84. Wainwright B, Bhan R, Trad C, et al. Autoimmune-mediated congenital heart block. *Best Pract Res Clin Obstet Gynaecol.* 2020;64:41-51. doi:10.1016/j.bpobgyn.2019.09.001
85. Vanoni F, Lava SAG, Fossali EF, et al. Neonatal Systemic Lupus Erythematosus Syndrome: a Comprehensive Review. *Clin Rev Allergy Immunol.* 2017;53:469-476. doi:10.1007/s12016-017-8653-0
86. Jaeggi E, Laskin C, Hamilton R, Kingdom J, Silverman E. The Importance of the Level of Maternal Anti-Ro/SSA Antibodies as a Prognostic Marker of the Development of Cardiac Neonatal Lupus Erythematosus. A Prospective Study of 186 Antibody-Exposed Fetuses and Infants. *J Am Coll Cardiol.* 2010;55:2778-2784. doi:10.1016/j.jacc.2010.02.042
87. Izmirly P, Saxena A, Buyon JP. Progress in the pathogenesis and treatment of cardiac manifestations of neonatal lupus. *Curr Opin Rheumatol.* 2017;29:467-472. doi:10.1097/BOR.0000000000000414.
88. Costedoat-Chalumeau N, Morel N, Fischer-Betz R, et al. Routine repeated echocardiographic monitoring of fetuses exposed to maternal anti-SSA antibodies: time to question the dogma. *Lancet Rheumatol.* 2019;1:e187-e193. doi:10.1016/S2665-9913(19)30069-4.

89. Izmirly PM, Saxena A, Kim MY, et al. Maternal and fetal factors associated with mortality and morbidity in a multiracial/ethnic registry of anti-SSA/Ro associated cardiac neonatal lupus. *Circulation*. 2011;124:1927–1935. DOI: 10.1161/CIRCULATIONAHA.111.033894.
90. Levesque K, Morel N, Maltret A, et al. Description of 214 cases of autoimmune congenital heart block: results of the French neonatal lupus syndrome. *Autoimmun Rev*. 2015;14:1154-1160. DOI: 10.1016/j.autrev.2015.08.005.
91. Izmirly PM, Costedoat-Chalumeau N, Pisoni C, et al. Maternal use of hydroxychloroquine is associated with a reduced risk of recurrent anti-SSA/Ro associated cardiac manifestations of neonatal lupus. *Circulation*. 2012;126:76-82. DOI: 10.1161/CIRCULATIONAHA.111.089268.
92. Izmirly PM, Kim M, Friedman DM, et al. Hydroxychloroquine to prevent recurrent congenital heart block in fetuses of anti-SSA/Ro-positive mothers. *J Am Coll Cardiol*. 2020;76:292-302. doi: 10.1016/j.jacc.2020.05.045.
